# Supplementary material for: A dioxadithiaazacrown ether–BODIPY dyad Hg2+ complex for detection of l-cysteine: fluorescence switching and application to soft material
Source: Royal Society of Chemistry journal article supplement (doi:10.1039/c4ra04486j), 2014-01-01
Supplement: c4ra04486j1.pdf [file c4ra04486j1.pdf]

Supporting Information (SI)

**A dioxadithiaazacrown ether-BODIPY dyad Hg<sup>2+</sup> complex for detection of L-cysteine:  
Fluorescence switching and application on soft material**

**Navdeep Kaur, Paramjit Kaur\* and Kamaljit Singh\***

*Department of Chemistry, UGC-Centre of Advanced Studies-I, Guru Nanak Dev University, Amritsar-  
143 005, Punjab, India.*

E-mail: [paramjit19in@yahoo.co.in](mailto:paramjit19in@yahoo.co.in); [kamaljit.chem@gndu.ac.in](mailto:kamaljit.chem@gndu.ac.in)

**Table of Contents**

|                                                                                                                                     |    |
|-------------------------------------------------------------------------------------------------------------------------------------|----|
| 1. General note to physical measurements.                                                                                           | S1 |
| 2. Quantum yield calculations.                                                                                                      | S1 |
| 3. Detection limit calculations.                                                                                                    | S1 |
| 4. Computational details.                                                                                                           | S1 |
| 5. Changes in the absorption spectrum of <b>1</b> upon addition of Hg <sup>2+</sup> .                                               | S2 |
| 6. Changes in the emission spectrum of <b>1</b> upon addition of Hg <sup>2+</sup> .                                                 | S2 |
| 7. <sup>1</sup> H NMR of <b>1</b> in CD <sub>3</sub> CN.                                                                            | S3 |
| 8. <sup>1</sup> H NMR of <b>1</b> :Hg <sup>2+</sup> ( <b>2</b> ) complex ( <b>1</b> and Hg <sup>2+</sup> in CD <sub>3</sub> CN).    | S3 |
| 9. Optimized structure of <b>2</b> .                                                                                                | S4 |
| 10. Cartesian coordinates of the optimized structure of <b>2</b> .                                                                  | S4 |
| 11. Determination of binding constant.                                                                                              | S7 |
| 12. <sup>1</sup> H NMR of <b>2</b> + cys complex ( <b>1</b> and Hg <sup>2+</sup> in CD <sub>3</sub> CN and cys in D <sub>2</sub> O) | S7 |
| 13. Representative detection limits for cys reported by various research groups.                                                    | S8 |
| 14. References                                                                                                                      | S8 |

**General note to physical measurements:**

<sup>1</sup>H NMR (300 MHz) spectra were recorded in CD<sub>3</sub>CN on a JEOL-FT NMR-AL. Tetramethylsilane (TMS) served as the internal standard (0 ppm for <sup>1</sup>H). Mass spectra were recorded on a Bruker micrOTOF-Q II 10356 spectrometer. Emission studies were made on Perkin Elmer LS 55 Fluorescence Spectrometer with excitation slit width as 10.0 and emission slit width as 5 with off emission correction mode. UV-Vis spectra were recorded on a HITACHI U-2900 spectrophotometer, with a quartz cuvette (path length, 1 cm) and studies were performed in AR grade acetonitrile. The cell holder of the spectrophotometer was maintained at 25<sup>o</sup>C (Peltier) for consistency in the recordings.

**Quantum yield calculations:**

The fluorescence quantum yields were measured with respect to 9, 10-diphenylanthracene as standard having quantum yield of 0.86 in cyclohexane.<sup>1</sup>

$$\Phi_u = \Phi_s \cdot F_u \cdot A_s \cdot \eta_u^2 / F_s \cdot A_u \cdot \eta_s^2$$

$\Phi$  = quantum yield

F = Integrated fluorescence intensity

A = Absorbance

$\eta$  = refractive index of solvent

s = standard i.e. 9, 10-diphenylanthracene

u = sample

**Detection limit calculations:**

The detection limit was calculated on the basis of the fluorescence titration. The fluorescence emission measurement of **2** was repeated 6 times, to deduce standard deviation ( $\sigma$ ) of blank measurement. To calculate the slope (K), ratio of the emission intensity at 520 nm was plotted against the concentration of cys. The detection limit was calculated using the following equation.

$$\text{Detection limit} = 3 \times \sigma / K$$

**Computational details:**

All theoretical calculations were carried out by using the Gaussian 09 suite of programs.<sup>2</sup> The molecular geometries of the chromophores were optimized at the DFT method employing the hybrid MPW1PW91 functional. The 6-31G\* basis set was used for C, H, B, F, Cl, N, S, and O atoms

whereas SDD with effective core potential for the metal ions was used for  $\text{Hg}^{2+}$ . The molecular structure was plotted using Gauss view 5.0.9.

### Studies on the detection of $\text{Hg}^{2+}$ by **1**:

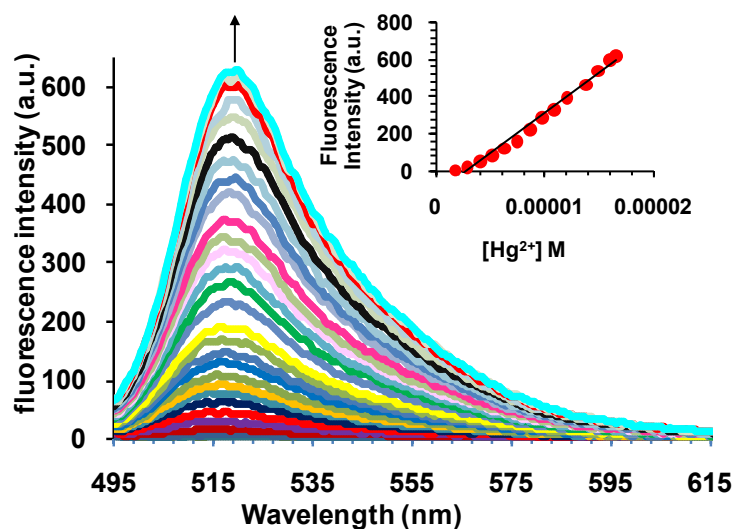

**Fig. S1** Changes in the emission spectrum of **1** ( $5 \times 10^{-6}$  M, in  $\text{CH}_3\text{CN}$ ) upon addition of different concentrations of  $\text{Hg}^{2+}$  ( $2.87 \times 10^{-7}$  M to  $1.14 \times 10^{-5}$  M in water) in  $\text{CH}_3\text{CN}$ .

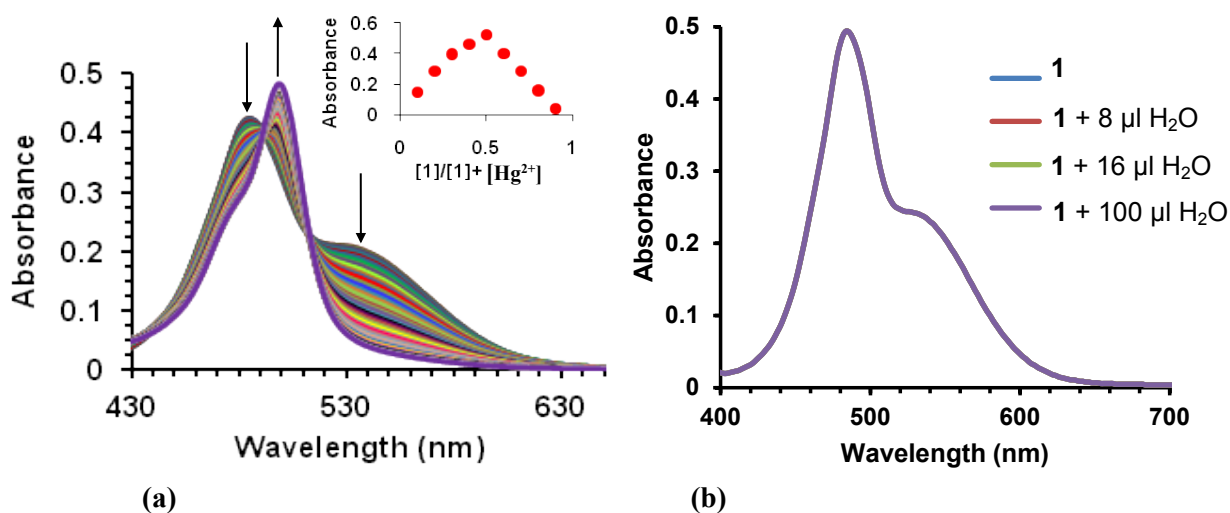

**Fig. S2** (a) Changes in the absorption spectrum of **1** ( $1 \times 10^{-5}$  M, in  $\text{CH}_3\text{CN}$ ) upon addition of different concentrations of  $\text{Hg}^{2+}$  ( $2.85 \times 10^{-7}$  to  $2.28 \times 10^{-5}$  M in water), in  $\text{CH}_3\text{CN}$ . (b) Changes in the absorption spectrum of **1** ( $1 \times 10^{-5}$  M, in  $\text{CH}_3\text{CN}$ ) upon addition of different amounts of  $\text{H}_2\text{O}$ .

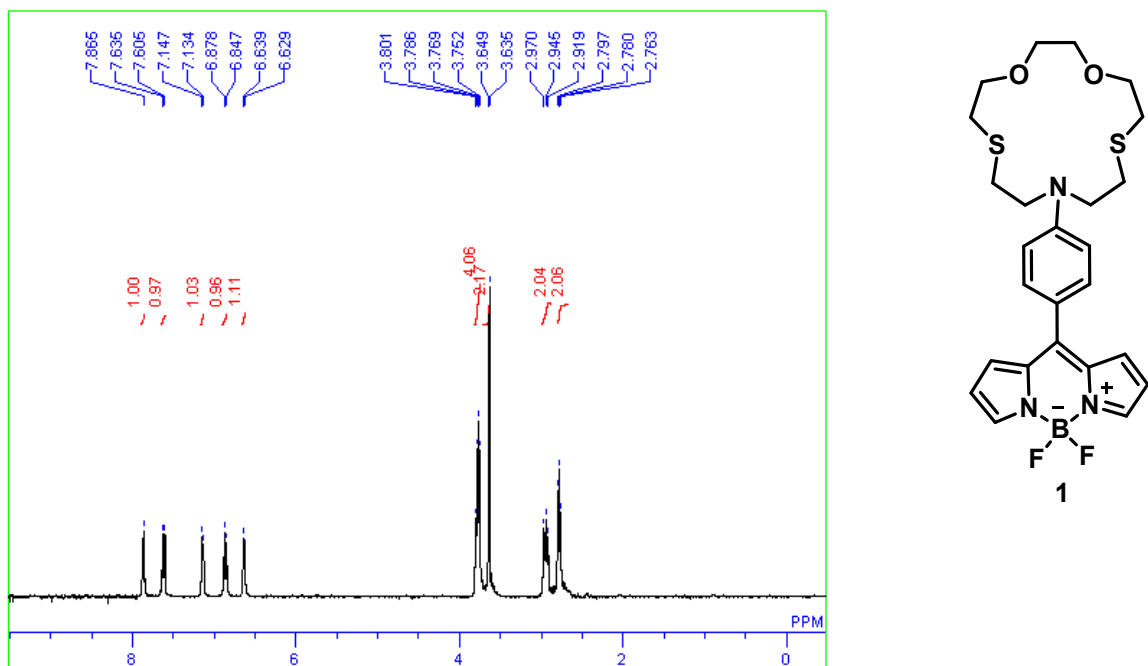

Fig. S3 <sup>1</sup>H NMR of **1** in CD<sub>3</sub>CN.

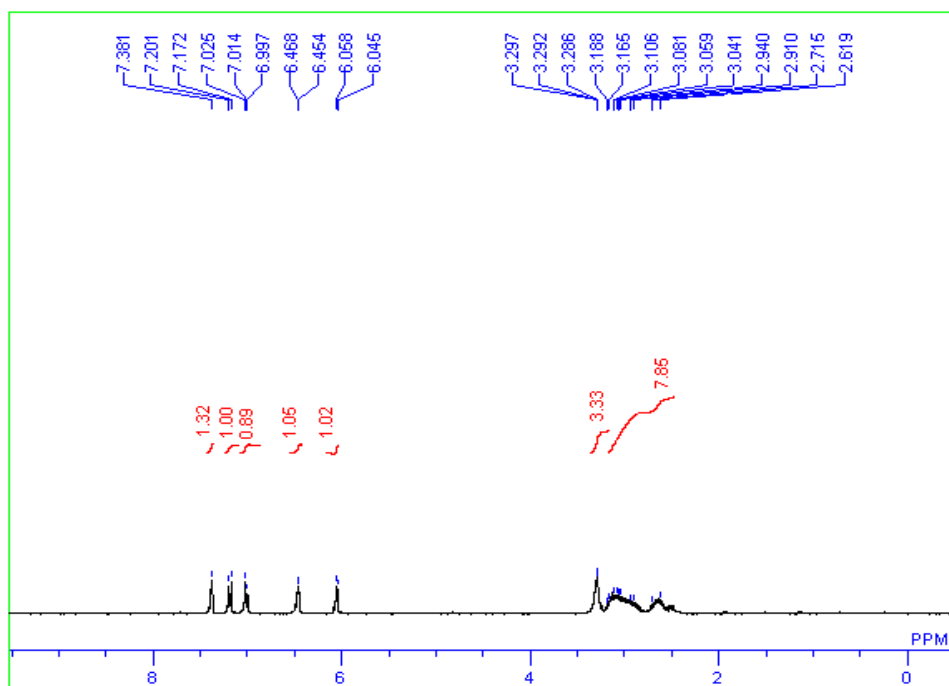

Fig. S4 <sup>1</sup>H NMR of **1**:Hg<sup>2+</sup>(**2**) complex (**1** and Hg<sup>2+</sup> in CD<sub>3</sub>CN).

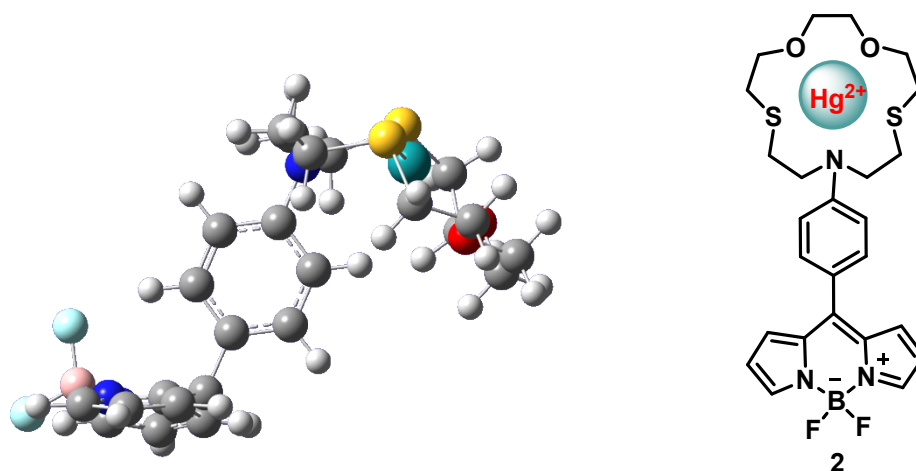

**Fig. S5** Optimized structure of **2** (color notation in the structure is as follows: Grey-Carbon, White-Hydrogen, Yellow-Sulphur, Dark blue-Nitrogen, Sky blue-Flourine, Red-Oxygen, Green-Mercury, Pink-Boron).

**Table S1:** Cartesian coordinates of **2**.

| Center Number | Atomic Number | Coordinates (Angstroms) |           |           |
|---------------|---------------|-------------------------|-----------|-----------|
|               |               | X                       | Y         | Z         |
| 1             | 6             | -1.495074               | -0.045411 | -1.617078 |
| 2             | 6             | -0.259175               | -0.000889 | -0.958797 |
| 3             | 6             | -0.236380               | 0.069008  | 0.429645  |
| 4             | 6             | -1.428165               | 0.090943  | 1.158031  |
| 5             | 6             | -2.657691               | 0.041489  | 0.505242  |
| 6             | 6             | -2.677139               | -0.028214 | -0.895745 |
| 7             | 1             | -1.547870               | -0.093617 | -2.701164 |
| 8             | 1             | 0.711554                | 0.121261  | 0.965359  |
| 9             | 1             | -1.390473               | 0.148768  | 2.241409  |
| 10            | 1             | -3.626833               | -0.069685 | -1.423292 |
| 11            | 7             | 0.982333                | -0.008875 | -1.725834 |
| 12            | 1             | 1.866119                | -1.058228 | -3.324432 |
| 13            | 1             | 0.242136                | 1.386450  | -3.154798 |
| 14            | 6             | 1.576977                | -2.440601 | -1.689066 |

|    |    |          |           |           |
|----|----|----------|-----------|-----------|
| 15 | 6  | 1.357409 | 2.469235  | -1.712810 |
| 16 | 6  | 1.139050 | -1.242664 | -2.527493 |
| 17 | 6  | 1.137590 | 1.211521  | -2.546225 |
| 18 | 1  | 0.194957 | -1.508594 | -3.014466 |
| 19 | 1  | 1.972469 | 1.065339  | -3.238641 |
| 20 | 1  | 1.489287 | -3.357290 | -2.276687 |
| 21 | 1  | 1.311041 | 3.347705  | -2.359684 |
| 22 | 1  | 0.595507 | 2.562916  | -0.935083 |
| 23 | 1  | 0.967642 | -2.534556 | -0.786722 |
| 24 | 16 | 3.351126 | -2.264916 | -1.243392 |
| 25 | 16 | 3.017386 | 2.506436  | -0.910828 |
| 26 | 6  | 3.583993 | -3.298747 | 0.245595  |
| 27 | 6  | 2.685265 | 3.261325  | 0.732118  |
| 28 | 1  | 4.668958 | -3.414558 | 0.312930  |
| 29 | 1  | 1.622426 | 3.144137  | 0.954705  |
| 30 | 6  | 3.028300 | -2.732494 | 1.538996  |
| 31 | 6  | 3.526803 | 2.629553  | 1.823702  |
| 32 | 1  | 3.375451 | -3.373396 | 2.358172  |
| 33 | 1  | 1.930385 | -2.726551 | 1.552849  |
| 34 | 1  | 4.600889 | 2.712309  | 1.613055  |
| 35 | 1  | 3.320094 | 3.162229  | 2.759543  |
| 36 | 8  | 3.531848 | -1.418327 | 1.706694  |
| 37 | 8  | 3.145701 | 1.268448  | 1.952594  |
| 38 | 6  | 3.301902 | -0.850705 | 2.994438  |
| 39 | 6  | 3.843298 | 0.556094  | 2.973572  |
| 40 | 1  | 2.228196 | -0.851167 | 3.218936  |
| 41 | 1  | 3.824590 | -1.436588 | 3.758297  |

|    |    |           |           |           |
|----|----|-----------|-----------|-----------|
| 42 | 1  | 4.919394  | 0.556837  | 2.762490  |
| 43 | 1  | 3.671183  | 1.030924  | 3.945691  |
| 44 | 6  | -3.976869 | 0.062779  | 1.293534  |
| 45 | 1  | -3.719608 | 0.143512  | 2.357666  |
| 46 | 6  | -4.591339 | 2.618634  | 1.292497  |
| 47 | 6  | -6.405481 | 2.405546  | -0.007623 |
| 48 | 6  | -5.634975 | 3.331491  | 0.713724  |
| 49 | 1  | -3.815251 | 2.999614  | 1.941291  |
| 50 | 1  | -7.303246 | 2.551617  | -0.589912 |
| 51 | 1  | -5.844426 | 4.386438  | 0.809758  |
| 52 | 6  | -4.452705 | -2.498351 | 1.644656  |
| 53 | 6  | -5.453540 | -3.339411 | 1.171585  |
| 54 | 1  | -3.660376 | -2.744560 | 2.337472  |
| 55 | 6  | -6.269075 | -2.564366 | 0.331945  |
| 56 | 1  | -5.606344 | -4.381011 | 1.411822  |
| 57 | 1  | -7.155050 | -2.837110 | -0.222175 |
| 58 | 6  | -4.701515 | -1.224736 | 1.090643  |
| 59 | 6  | -4.769642 | 1.269201  | 0.919495  |
| 60 | 7  | -5.796666 | -1.291934 | 0.290220  |
| 61 | 7  | -5.864795 | 1.166732  | 0.123112  |
| 62 | 5  | -6.315882 | -0.132100 | -0.615120 |
| 63 | 9  | -7.670719 | -0.178060 | -0.743855 |
| 64 | 9  | -5.656277 | -0.196022 | -1.844391 |
| 65 | 1  | 2.919605  | 4.324514  | 0.645329  |
| 66 | 1  | 3.154604  | -4.281149 | 0.032115  |
| 67 | 80 | 3.050147  | 0.060282  | -0.30785  |

### Determination of binding constant:

Binding constant was determined from the slope of the plot  $X_0 - X / X - X_{lim}$  vs [cys], where  $X_0$  = absorbance of sensor **2** without cys;  $X$  = absorbance of **2**+cys after each addition;  $X_{lim}$  = absorbance of titration solution at very high concentration of cys.

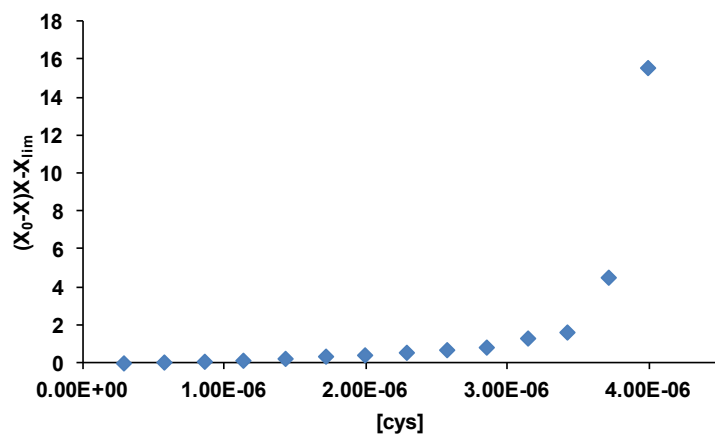

Fig. S6 Plot of  $X_0 - X / X - X_{lim}$  vs [cys] for determination of binding constants.

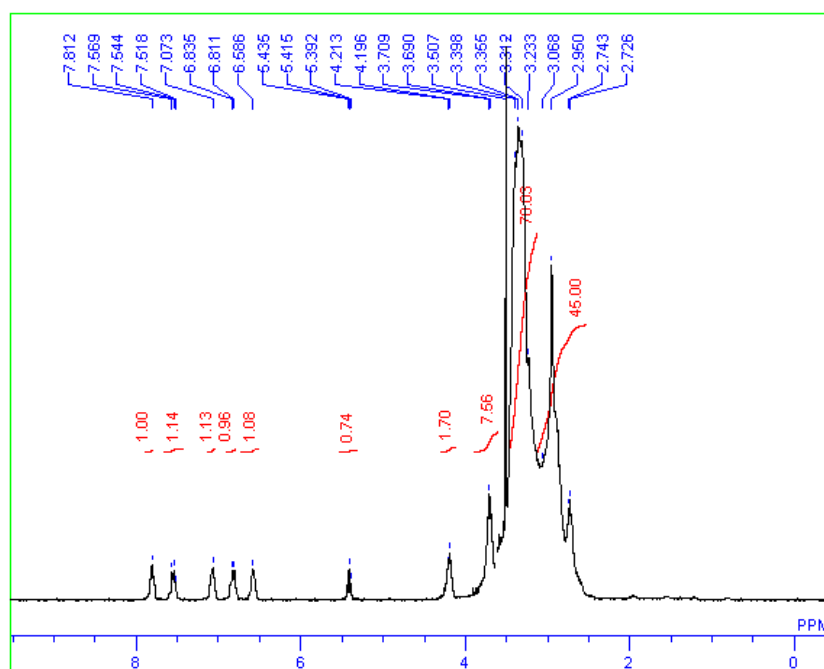

Fig. S7 <sup>1</sup>H NMR of **2**+cys (**1** and Hg<sup>2+</sup> in CD<sub>3</sub>CN and cys in D<sub>2</sub>O)



**Table. S2** Representative detection limits for cys reported by various research groups

| S. No. | Detection Limit    | Reference |
|--------|--------------------|-----------|
| 1      | 3.9 nM             | 3         |
| 2      | 10 $\mu$ M         | 4         |
| 3      | 0.46 $\mu$ M       | 5         |
| 4      | 0.08 $\mu$ M       | 6         |
| 5      | 19nM               | 7         |
| 6      | 0.008 $\mu$ M      | 8         |
| 7      | 5nM                | 9         |
| 8      | 0.18 $\mu$ M       | 10        |
| 9      | 2.7 $\mu$ M        | 11        |
| 10     | 0.28 $\mu$ M       | 12        |
| 11     | 0.03 $\mu$ M       | 13        |
| 12     | 10 <sup>-5</sup> M | 14        |
| 13     | 0.22 $\mu$ M       | 15        |
| 14     | 91.3nM             | 16        |

**References:**

1. J. V. Morris, M. A. Mahaney and J. R. Huber, *J. Phys. Chem. B.*, 1976, **80**, 969.
2. Gaussian 09, Revision B.01, M. J. Frisch, G. W. Trucks, H. B. Schlegel, G. E. Scuseria, M. A. Robb, J. R. Cheeseman, G. Scalmani, V. Barone, B. Mennucci, G. A. Petersson, H. Nakatsuji, M. Caricato, X. Li, H. P. Hratchian, A. F. Izmaylov, J. Bloino, G. Zheng, J. L. Sonnenberg, M. Hada, M. Ehara, K. Toyota, R. Fukuda, J. Hasegawa, M. Ishida, T. Nakajima, Y. Honda, O. Kitao, H. Nakai, T. Vreven, J. A. Montgomery, Jr., J. E. Peralta, F. Ogliaro, M. Bearpark, J. J. Heyd, E. Brothers, K. N. Kudin, V. N. Staroverov, T. Keith, R. Kobayashi, J. Normand, K. Raghavachari, A. Rendell, J. C. Burant, S. S. Iyengar, J. Tomasi, M. Cossi, N. Rega, J. M. Millam, M. Klene, J. E. Knox, J. B. Cross, V. Bakken, C. Adamo, J. Jaramillo, R. Gomperts, R. E. Stratmann, O. Yazyev, A. J. Austin, R. Cammi, C. Pomelli, J. W. Ochterski, R. L. Martin, K. Morokuma, V. G. Zakrzewski, G. A. Voth, P. Salvador, J. J. Dannenberg, S. Dapprich, A. D. Daniels, O. Farkas, J. B. Foresman, J. V. Ortiz, J. Cioslowski, and D. J. Fox, Gaussian, Inc., Wallingford CT, **2010**.
3. Z. Yan, S. Guang, H. Xu and X. Liu, *Analyst*, 2011, **136**, 1916.
4. X. Wei, L. Qi, J. Tan, R. Liu and F. Wang, *Anal. Chim. Acta*, 2010, **671**, 80–84.
5. H. Razmi and H. Heidari, *Anal. Biochem.*, 2009, **388**, 15-22.
6. L. P. Liu, Z. J. Yin and Z. S. Yang, *Bioelectrochemistry*, 2010, **79**, 84–89.

7. S. M. Jia, X. F. Liu, P. Li, D. M. Kong and H. X. Shen, *Biosens. Bioelectronics.*, 2011, **27** 148–152.
8. H. Hosseini, H. Ahmar, A. Dehghani, A. Bagheri, A. Tadjarodi and A. R. Fakhari, *Biosens. Bioelectronics.*, 2013, **42**, 426–429.
9. H. Su, F. Qiao, R. Duan, L. Chen and S. Ai, *Biosens. Bioelectronics.*, 2013, **43**, 268–273.
10. P. C. Pandey, A. K. Pandey and D. S. Chauhan, *Electrochimica Acta*, 2012, **74**, 23–31.
11. M. Santhiago, P. R. Lima, W. de J. R. Santos and L. T. Kubota, *Sens. Actuators B*, 2010, **146** 213–220.
12. H. Yan, H. Su, D. Tian, F. Miao and H. Li, *Sens. Actuators B*, 2011, **160**, 656–661.
13. J. M. Liu, L. Jiao, L. H. Zhang, Z. Y. Zheng, X. X. Wang, L. P. Lin and S. L. Jiang, *Sens. Actuators B*, 2013, **188**, 613–620.
14. P. D. Torre, O. G. Beltrán, W. Tiznado, N. Mena, L. A. Saavedra, M. G. Cabrera, J. Trilleras, P. Pavez and M. E. Aliaga, *Sens. Actuators B*, 2014, **193**, 391–399.
15. F. Miao, J. Zhan, Z. Zou, D. Tian and H. Li, *Tetrahedron*, 2012 **68** 2409–2413.
16. H. P. Fang, M. Shellaiah, A. Singh, M. V. R. Raju, Y. H. Wu and H. C. Lin, *Sens. Actuators B*, 2014, **194**, 229–237.
